# Supplementary material for: The Jacalin-Related Lectin HvHorcH Is Involved in the Physiological Response of Barley Roots to Salt Stress
Source: MDPI journal article supplement (doi:10.3390/ijms221910248), 2021-09-23
Supplement: s1 [file s1]

```

-----
HvHorchH      L  V  P  HA H  R E  DA  K  E HA
horcolin      P  N  E  PK I  S T  AI  A  V TD
***** ** . ***:  * *: . : :*.. :.:* *** . .
-----
HvHorchH      D  V  -  N  D  Y  V  F
horcolin      V  S  K  T  A  V  -
** .*: **...*.:.*:.*: *:***** *:.*: ..*****:*
-----
HvHorchH      Q IEC I  G  T  D  L
horcolin      V KIY -  T  L  A  T
*.:* *  * :*: * .*:*** .*:*:*****.* :*:***:* *

```

**Figure S1.** Alignment of the amino acid sequences of horcolin (*HORVU1Hr1G000160*) and HvHorchH (*HORVU7Hr1G059330*) using T-Coffee program [1]. Residues matching the consensus sequence exactly are shaded in black and marked with “\*”, conserved substitutions are shaded in grey (“:”) and semi-conserved substitutions are shaded in light grey (“.”). The dashed line on top of the alignment indicates the conserved jacalin domain.

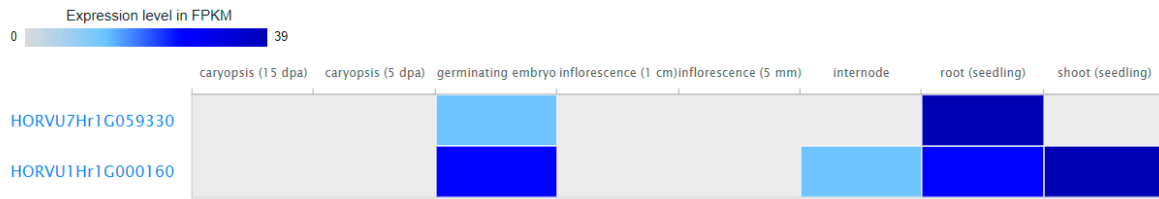

**Figure S2.** Expression profiles of JRL31 members in barley tissues. The coding sequences of the yet unannotated barley JRL31 *HORVU7Hr1G059330* (named *HvHorch*) and of the related mannose-specific JRL *HORVU1Hr1G000160* (*horcolin* from barley coleoptiles, [2]) were compared regarding their development and organ specific expression. Analysis was performed using the Expression Atlas (<https://www.ebi.ac.uk/gxa/home>, accessed on 24<sup>th</sup> August 2021). FPMK, fragments per kilobase million.

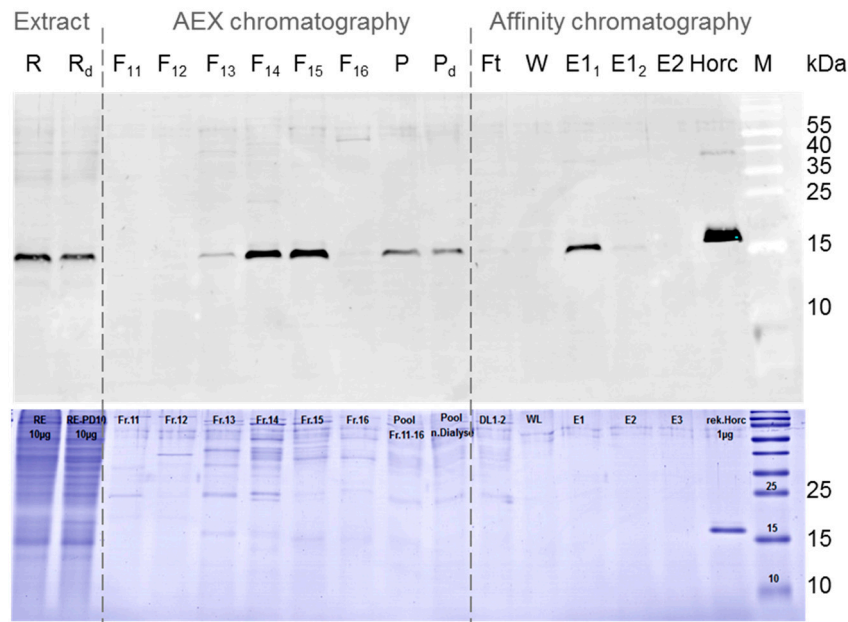

**Figure S3.** Enrichment of *HvHorchH* by anion exchange (AEX) and mannose affinity chromatography. Fractions of the various isolation steps were subjected to protein gel blot analysis and abundance of *HvHorchH* immunologically detected with a polyclonal anti-*HvHorchH* antibody. A protein band corresponding to *HvHorchH* was detected at a molecular weight of about 15 kDa in the native root extract (R) and after desalting and buffer exchange (R<sub>d</sub>). Selective enrichment was observed in fractions from AEX (F<sub>13</sub> to F<sub>16</sub>) and mannose affinity chromatography (E<sub>1</sub>). As a protein control recombinant expressed *HvHorchH* with a poly-histidine affinity tag was loaded (Horc) producing a signal in the range of 15 to 18 kDa. Loading for protein gel blot analysis (upper blot) and SDS-PAGE (lower gel) was as follows: R—native root extract, 2.5 µg; R<sub>d</sub>—native root extract after desalting and buffer exchange, 2.5 µg; F<sub>11</sub> to F<sub>16</sub>—fractions from AEX chromatography, 10 µL; P—pool of AEX F<sub>11</sub> to F<sub>16</sub>, 10 µL; P<sub>d</sub>—pool of F<sub>11</sub> to F<sub>16</sub> after dialysis, 10 µL; Ft—flow through, 10 µL; W—wash fraction, 10 µL; E<sub>1</sub>—first elution with elution buffer 1, 5 µL; E<sub>2</sub>—second elution with elution buffer 1, 5 µL; E<sub>3</sub>—first elution with elution buffer 2, 10 µL; Horc—recombinant *HvHorchH*, 10 ng; M—marker, PageRuler™ Prestained Protein Ladder, 10 to 180 kDa (Thermo Scientific), 4 µL.

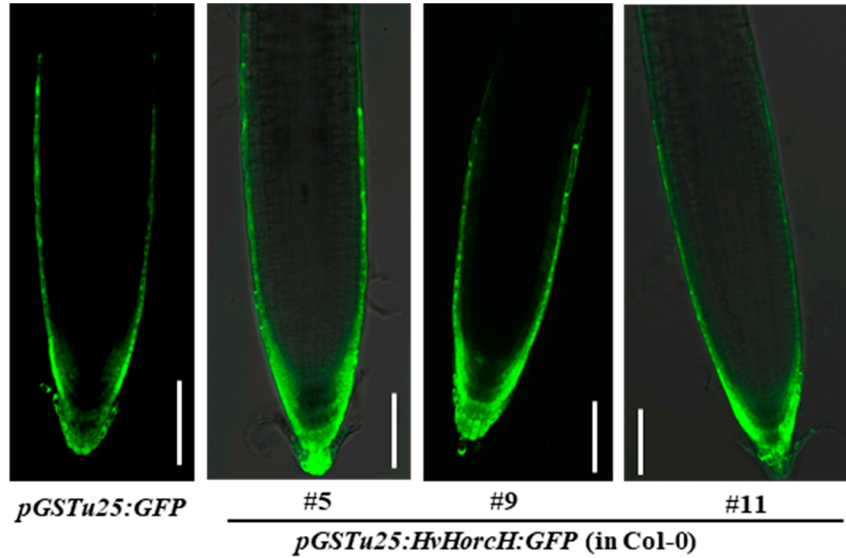

**Figure S4.** Generation of transgenic Arabidopsis plants expressing HvHorchH. Root tip-specific expression of *HvHorchH:GFP* fusion protein of numerous transgenic lines was verified by confocal microscopy. Representative images of primary root tips of five-day-old seedlings were shown. Scale bars: 100  $\mu$ m.

**Table S1.** Protocol for the preparation of barley root tips for immunolocalization of HvHorchH using microwave-assisted fixation, dehydration and embedding in LR White acrylic resin.

| Combined conventional & microwave assisted tissue preparation in a<br>PELCO Bio Wave®Pro+ (Ted Pella, Inc., Redding, USA) |                                                                                                      |                            |               |                   |
|---------------------------------------------------------------------------------------------------------------------------|------------------------------------------------------------------------------------------------------|----------------------------|---------------|-------------------|
| Process                                                                                                                   | Reagent                                                                                              | Power<br>[W]               | Time<br>[sec] | Vacuum<br>[mm Hg] |
| 1. Primary<br><br>fixation                                                                                                | 0.5% (v/v) glutaraldehyde<br>and 2.0% (v/v) paraformaldehyde<br>in 0.05 M cacodylate buffer (pH 7.3) | 0                          | 60            | 0                 |
|                                                                                                                           |                                                                                                      | 150                        | 60            | 0                 |
|                                                                                                                           |                                                                                                      | 0                          | 60            | 0                 |
|                                                                                                                           |                                                                                                      | 150                        | 60            | 0                 |
| 2. Wash                                                                                                                   | 1 × 0.05 M cacodylate buffer (pH 7.3)<br>and 2x aqua dest.                                           | 150                        | 45            | 0                 |
| 3. Dehydration                                                                                                            | acetone:30%, 40%, 50%, 60%,<br>70%, 80%, 90%, 2x 100%                                                | 150                        | 45            | 0                 |
|                                                                                                                           | after each step samples were kept for additional 15 min on a shaker                                  |                            |               |                   |
| 4. Resin Infiltration                                                                                                     | 25% LR White resin in acetone                                                                        | 2 hrs on shaker at RT      |               |                   |
|                                                                                                                           | 50% LR White resin in acetone                                                                        | 2 hrs on shaker at RT      |               |                   |
|                                                                                                                           | 75% LR White resin in acetone                                                                        | 2 hrs on shaker at RT      |               |                   |
|                                                                                                                           | 100% LR White resin                                                                                  | over night on shaker at RT |               |                   |
| 5. Polymerization                                                                                                         | 48 hrs at 60°C in BEEM capsules in a heating cabinet.                                                |                            |               |                   |

## References

1. Di Tommaso, P.; Moretti, S.; Xenarios, I.; Orobitz, M.; Montanyola, A.; Chang, J.M.; Taly, J.F.; Notredame, C. T-Coffee: A web server for the multiple sequence alignment of protein and RNA sequences using structural information and homology extension. *Nucleic Acids Res.* **2011**, *39*, W13–W17.
2. Grunwald, I.; Heinig, I.; Thole, H.H.; Neumann, D.; Kahmann, U.; Kloppstech, K.; Gau, A.E. Purification and characterisation of a jacalin-related, coleoptile specific lectin from *Hordeum vulgare*. *Planta* **2007**, *226*, 225–234.
